# Supplementary material for: Contemporary National Patterns of Eligibility and Use of Novel Lipid‐Lowering Therapies in the United States
Source: PubMed Central journal article supplement — J Am Heart Assoc. 2022 Sep 14;11(18):e026075. doi: 10.1161/JAHA.122.026075 (PMC9683659; doi:10.1161/jaha.122.026075), 2022-09-14

**Online Supplement  
(Shen et al)**

**Table S1. Demographics characteristics and medical comorbidities of overall study population.** Weighted percentages represent the proportions of individuals within each demographic or comorbidity subgroup in our study population. Abbreviations: PCSK9i, proprotein convertase subtilisin kexin type 9 inhibitor; IPE, icosapent ethyl; ASCVD, atherosclerotic cardiovascular disease; CKD, chronic kidney disease. \*M represents population in millions.

|                         | <b>N</b> | <b>Weighted % [95% CI]</b> | <b>Weighted Population</b> |
|-------------------------|----------|----------------------------|----------------------------|
| Overall                 | 2729     | 100.0                      | 149.3M*                    |
| <b>Age (years)</b>      |          |                            |                            |
| ≥65                     | 990      | 32.9 [29.6 – 36.2]         | 49.1M                      |
| 40-64                   | 1739     | 67.1 [63.8 – 70.4]         | 100.2M                     |
| <b>Sex</b>              |          |                            |                            |
| Female                  | 1384     | 52.5 [49.8 – 55.1]         | 78.3M                      |
| Male                    | 1345     | 47.5 [44.9 – 50.2]         | 71.0M                      |
| <b>Race</b>             |          |                            |                            |
| Non-Hispanic White      | 968      | 66.2 [62.1 – 70.4]         | 98.9M                      |
| Non-Hispanic Black      | 698      | 10.7 [7.9 – 13.6]          | 16.0M                      |
| Non-Hispanic Asian      | 339      | 5.7 [3.8 – 7.6]            | 8.4M                       |
| Mexican American        | 308      | 6.7 [5.0 – 8.5]            | 10.1M                      |
| Other Hispanic          | 297      | 6.8 [5.4 – 8.2]            | 10.2M                      |
| Other Race              | 119      | 3.9 [2.6 – 5.2]            | 5.8M                       |
| <b>Health Insurance</b> |          |                            |                            |
| Yes                     | 2404     | 90.2 [87.5 – 92.8]         | 134.6M                     |
| No                      | 325      | 9.8 [7.1 – 12.5]           | 14.7M                      |
| <b>Comorbidities</b>    |          |                            |                            |
| ASCVD                   | 435      | 14.0 [11.3 – 16.6]         | 20.8M                      |
| Hypertension            | 1349     | 43.3 [39.6 – 47.1]         | 64.7M                      |
| Dyslipidemia            | 1304     | 48.1 [45.6 – 50.7]         | 71.8M                      |
| Diabetes                | 601      | 16.7 [14.5 – 18.8]         | 24.9M                      |
| CKD                     | 396      | 13.6 [11.7 – 15.5]         | 20.2M                      |
| Heart Failure           | 140      | 3.5 [2.4 – 4.6]            | 5.2M                       |
| Smoking                 | 490      | 15.3 [12.8 – 17.9]         | 22.9M                      |

**Table S2. Overall use of baseline lipid-lowering therapies and novel agents.**

Weighted percentages represent the proportions of individuals with use of the corresponding drug classes and combinations of drug classes irrespective of guideline indications. Abbreviations: PCSK9i, proprotein convertase subtilisin kexin type 9 inhibitor; IPE, icosapent ethyl. \*M represents population in millions.

|                                            | <b>N</b> | <b>Weighted % [95% CI]</b> | <b>Weighted Population</b> |
|--------------------------------------------|----------|----------------------------|----------------------------|
| <b>Baseline lipid-lowering therapy</b>     |          |                            |                            |
| Any statin                                 | 874      | 30.7 [26.9 – 34.5]         | 45.8M*                     |
| Low-moderate intensity statin              | 340      | 12.5 [10.3 – 14.5]         | 18.6M                      |
| Moderate-high intensity statin             | 534      | 18.2 [15.5 – 20.9]         | 27.2M                      |
| Ezetimibe                                  | 28       | 1.7 [0.61 – 2.8]           | 2.5M                       |
| Low-moderate intensity statin + ezetimibe  | 10       | 0.62 [0.00 – 1.4]          | 931,954                    |
| Moderate-high intensity statin + ezetimibe | 7        | 0.26 [0.00 – 0.53]         | 381,074                    |
| <b>Novel agents</b>                        |          |                            |                            |
| PCSK9i                                     | 5        | 0.17 [0.01 – 0.33]         | 253,528                    |
| IPE                                        | 2        | 0.16 [0.00 – 0.43]         | 233,064                    |

**Table S3. Current eligibility for PCSK9i and IPE in study population across demographic and comorbidity profiles.** Weighted percentages represent the proportion of individuals within each demographic or comorbidity subgroup who are eligible for the corresponding drug classes. Abbreviations: PCSK9i, proprotein convertase subtilisin kexin type 9 inhibitor; IPE, icosapent ethyl; ASCVD, atherosclerotic cardiovascular disease; CKD, chronic kidney disease. \*M represents population in millions.

|                    | Overall N | PCSK9i     |                      |                     | IPE        |                     |                     |
|--------------------|-----------|------------|----------------------|---------------------|------------|---------------------|---------------------|
|                    |           | Eligible N | Weighted % [95% CI]  | Weighted Population | Eligible N | Weighted % [95% CI] | Weighted Population |
| Overall            | 2729      | 1          | 0.018 [0.00 – 0.054] | 27,117              | 91         | 3.1 [2.0 – 4.2]     | 4.6M*               |
| Age (years)        |           |            |                      |                     |            |                     |                     |
| ≥65                | 990       | 1          | 0.055 [0.00 – 0.16]  | 27,117              | 46         | 5.1 [3.1 – 7.0]     | 2.5M                |
| 40-64              | 1739      | 0          | 0.00                 | 0                   | 45         | 2.2 [1.2 – 3.1]     | 2.2M                |
| Sex                |           |            |                      |                     |            |                     |                     |
| Female             | 1384      | 1          | 0.035 [0.00 – 0.10]  | 27,117              | 36         | 2.0 [1.1 – 2.9]     | 1.6M                |
| Male               | 1345      | 0          | 0.00                 | 0                   | 55         | 4.3 [2.1 – 6.6]     | 3.1M                |
| Race               |           |            |                      |                     |            |                     |                     |
| Non-Hispanic White | 968       | 1          | 0.027 [0.00 – 0.081] | 27,117              | 49         | 3.5 [1.9 – 5.0]     | 3.4M                |
| Non-Hispanic Black | 698       | 0          | 0.00                 | 0                   | 12         | 2.0 [1.1 – 2.9]     | 321,879             |
| Non-Hispanic Asian | 339       | 0          | 0.00                 | 0                   | 4          | 1.2 [0.0 – 2.4]     | 97,996              |
| Mexican American   | 308       | 0          | 0.00                 | 0                   | 10         | 2.7 [0.9 – 4.6]     | 274,543             |
| Other Hispanic     | 297       | 0          | 0.00                 | 0                   | 9          | 2.1 [0.0 – 4.6]     | 217,504             |
| Other Race         | 119       | 0          | 0.00                 | 0                   | 7          | 5.4 [1.7 – 9.1]     | 310,197             |
| Health Insurance   |           |            |                      |                     |            |                     |                     |
| Yes                | 2404      | 1          | 0.020 [0.00 – 0.060] | 27,117              | 86         | 3.4 [2.2 – 4.6]     | 4.5M                |
| No                 | 325       | 0          | 0.00                 | 0                   | 5          | 0.71 [0.00 – 1.5]   | 103,339             |
| Comorbidities      |           |            |                      |                     |            |                     |                     |
| ASCVD              | 435       | 1          | 0.13 [0.00 – 0.38]   | 27,117              | 52         | 13.9 [6.9 – 20.9]   | 2.9M                |
| Hypertension       | 1349      | 0          | 0.00                 | 0                   | 77         | 5.6 [3.5 – 7.7]     | 3.6M                |
| Dyslipidemia       | 1304      | 1          | 0.038 [0.00 – 0.11]  | 27,117              | 79         | 5.6 [3.6 – 7.5]     | 4.0M                |
| Diabetes           | 601       | 1          | 0.11 [0.00 – 0.32]   | 27,117              | 70         | 14.8 [9.4 – 20.1]   | 3.7M                |
| CKD                | 396       | 0          | 0.00                 | 0                   | 32         | 7.0 [3.5 – 10.6]    | 1.4M                |
| Heart Failure      | 140       | 0          | 0.00                 | 27,117              | 20         | 17.8 [5.3 – 30.3]   | 920,056             |
| Smoking            | 490       | 1          | 0.12 [0.00 – 0.35]   | 27,117              | 15         | 3.0 [1.4 – 4.5]     | 677,483             |

**Table S4. Simulated eligibilities for PCSK9i and IPE.** Weighted percentages represent the proportions of individuals who are eligible for PCSK9i and IPE in the respective populations. Abbreviations: PCSK9i, proprotein convertase subtilisin kexin type 9 inhibitor; IPE, icosapent ethyl. \*M represents population in millions.

|        | <b>Model 1: statin use contraindicated in those not on statins</b> |                            | <b>Model 2: initiation and maximal escalation of lipid-lowering therapies</b> |                            |
|--------|--------------------------------------------------------------------|----------------------------|-------------------------------------------------------------------------------|----------------------------|
|        | <b>Weighted % [95% CI]</b>                                         | <b>Weighted Population</b> | <b>Weighted % [95% CI]</b>                                                    | <b>Weighted Population</b> |
| PCSK9i | 6.5 [4.9 – 8.1]                                                    | 9.7M*                      | 4.1 [2.8 – 5.4]                                                               | 6.1M                       |
| IPE    | 7.8 [6.2 – 9.3]                                                    | 11.6M                      | 6.8 [5.4 – 8.3]                                                               | 10.2M                      |

**Figure S1. Simulated eligibilities for PCSK9i and IPE in overall study population and across demographic subgroups.** Simulated eligibilities for (A) PCSK9i and (B) IPE. Model 1: assumes existing lipid-lowering therapy as the maximum tolerated. Model 2: assumes initiation and maximal escalation of pre-existing lipid-lowering therapies and accounting for expected lipid profile changes. Bars represent weighted proportions (%) with 95% confidence interval of eligible individuals for each drug class. Abbreviations: PCSK9i, proprotein convertase subtilisin kexin type 9 inhibitor; IPE, icosapent ethyl.

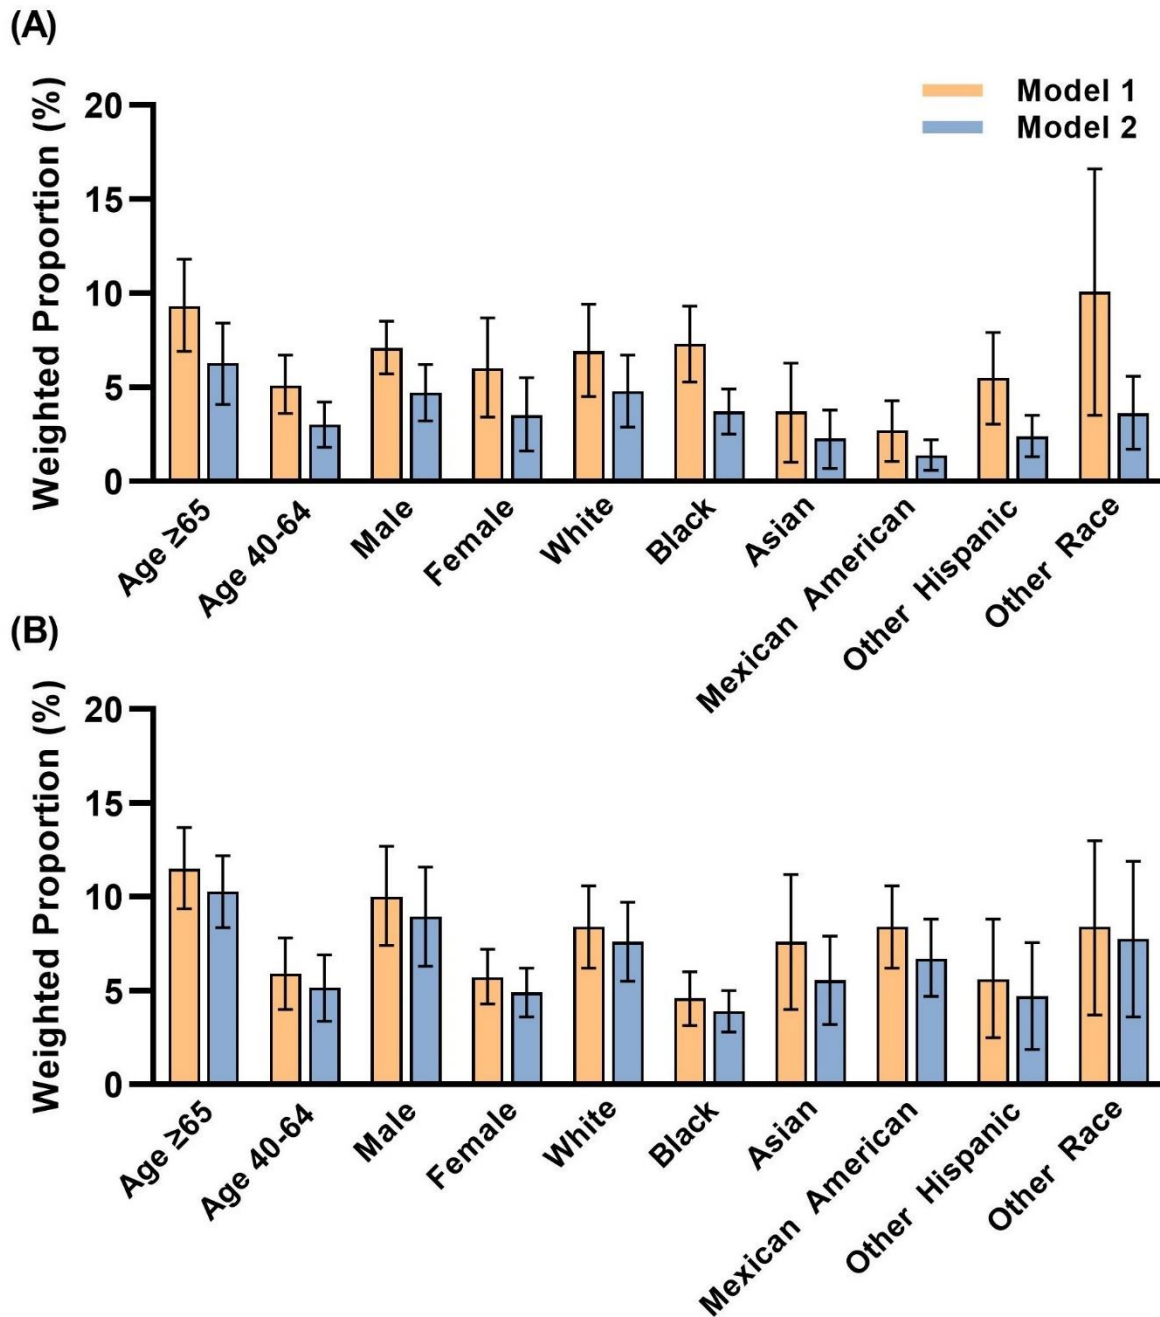

**Figure S2. Distributions of original and simulated mean LDL-C and triglyceride levels after maximal escalation of lipid-lowering therapy by key subpopulations.** Original and mean post-escalation LDL-C assuming initiation and maximal escalation of statin and ezetimibe in **(A)** ASCVD population. Original and mean post-escalation triglycerides assuming initiation and maximal escalation of statins in **(B)** ASCVD and **(C)** diabetic populations. Post-escalation LDL-C and triglycerides are presented as mean values due to bootstrapping method. Abbreviations: LDL-C, low density lipoprotein cholesterol; ASCVD, atherosclerotic cardiovascular disease.

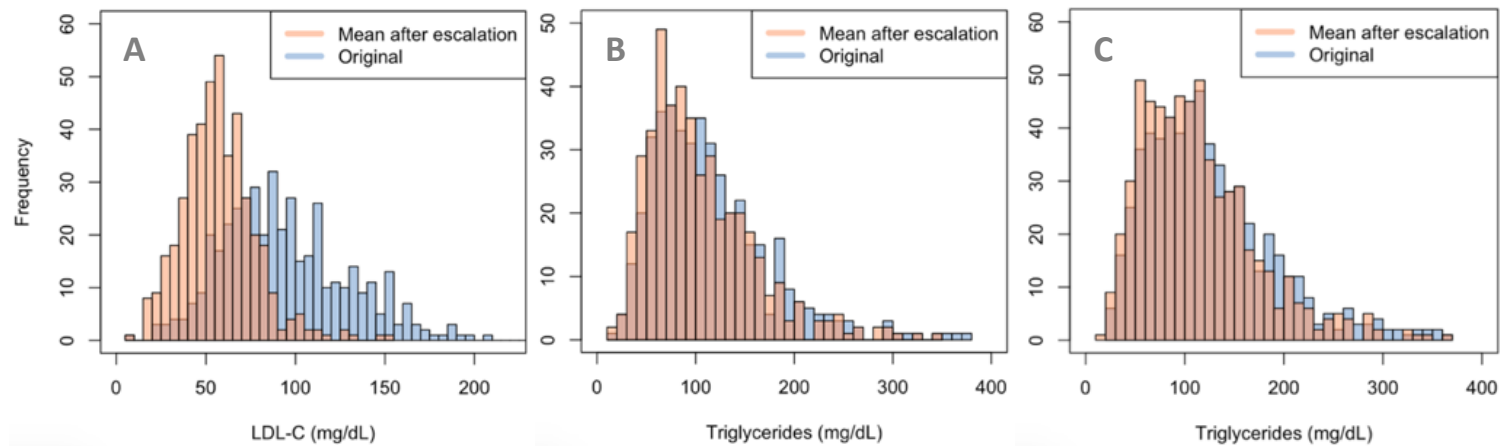

Supplement: JAH3-11-e026075-s001.pdf [file JAH3-11-e026075-s001.pdf]
